# Supplementary material for: Establishing a Split Luciferase Assay for Proteinkinase G (PKG) Interaction Studies
Source: Int J Mol Sci. 2018 Apr 12;19(4):1180. doi: 10.3390/ijms19041180 (PMC5979328; doi:10.3390/ijms19041180)
Supplement: Supplementary file 1 [file ijms-19-01180-s001.pdf]

## Supplementary Materials

**Table S1. Primers for cloning.** Inserted restriction sites are highlighted in bold. Amplification of DNA for cloning of cGKI $\alpha$ -vectors was performed as tandem-PCRS whereas the second PCR was run with the forward-primer containing the restriction site (see also in schematic illustration below table). If necessary, DNA-sequences were purified following agarose-gel-electrophoresis and subsequent methylene-blue-staining using QIAquick Gel extraction kit (Qiagen, Hilden, Germany).

| Name    | Sequence [5'-->3'], Restriction Site        | Target cDNA   | Amplified Sequence Used for Cloning of Vector:  |
|---------|---------------------------------------------|---------------|-------------------------------------------------|
| MT1_1_f | 5'-AGTGGCATGAGCGAGCTG-3'                    | cGKI $\alpha$ | CBRC-L-cGKI $\alpha$ and CBRN-L-cGKI $\alpha$   |
| MT1_2_f | 5'-GGCGGATCCAGTGGCATG-3' : BamHI            | cGKI $\alpha$ | CBRC-L-cGKI $\alpha$ and CBRN-L-cGKI $\alpha$   |
| MT2_1_r | 5'-GAACCGCGGGCCTTAGAAGTCTAT-3' : SacII      | cGKI $\alpha$ | CBRC-L-cGKI $\alpha$ and CBRN-L-cGKI $\alpha$   |
| MT3_1_f | 5'-GCCGCCATGAGCGAG - 3'                     | cGKI $\alpha$ | cGKI $\alpha$ -L-CBRC and cGKI $\alpha$ -L-CBRN |
| MT3_2_f | 5'-TATGCTAGCGCCGCCATG-3' : NheI             | cGKI $\alpha$ | cGKI $\alpha$ -L-CBRC and cGKI $\alpha$ -L-CBRN |
| MT4_1_r | 5'-ACTCGAGCCGAAGTCTATGTC - 3' : XhoI        | cGKI $\alpha$ | cGKI $\alpha$ -L-CBRC and cGKI $\alpha$ -L-CBRN |
| MT4_2_r | 5'-ACCACCACTCGAGCCGAA-3' : XhoI             | cGKI $\alpha$ | cGKI $\alpha$ -L-CBRC and cGKI $\alpha$ -L-CBRN |
| MT10_f  | 5'-CGACTGGATCCGTACCGAGG-3' : BamHI          | RGS2          | CBRC-L-RGS2 and CBRN-L-RGS2                     |
| MT6_r   | 5'-GAACCGCGGTCATGTAGCATGAGG-3' : SacII      | RGS2          | CBRC-L-RGS2 and CBRN-L-RGS2                     |
| MT7_f   | 5'-TTTAAACTTAAGCTGCCGCCGCGATCG-3' : AflIII  | RGS2          | RGS2-L-CBRC and RGS2-L-CBRN                     |
| MT9_r   | 5'-TTAAAACCTCGAGGTTGTAGCATGAGGCTC-3' : XhoI | RGS2          | RGS2-L-CBRC and RGS2-L-CBRN                     |

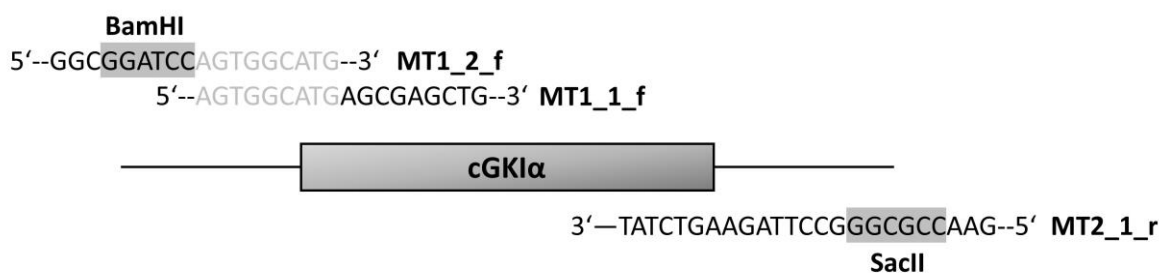

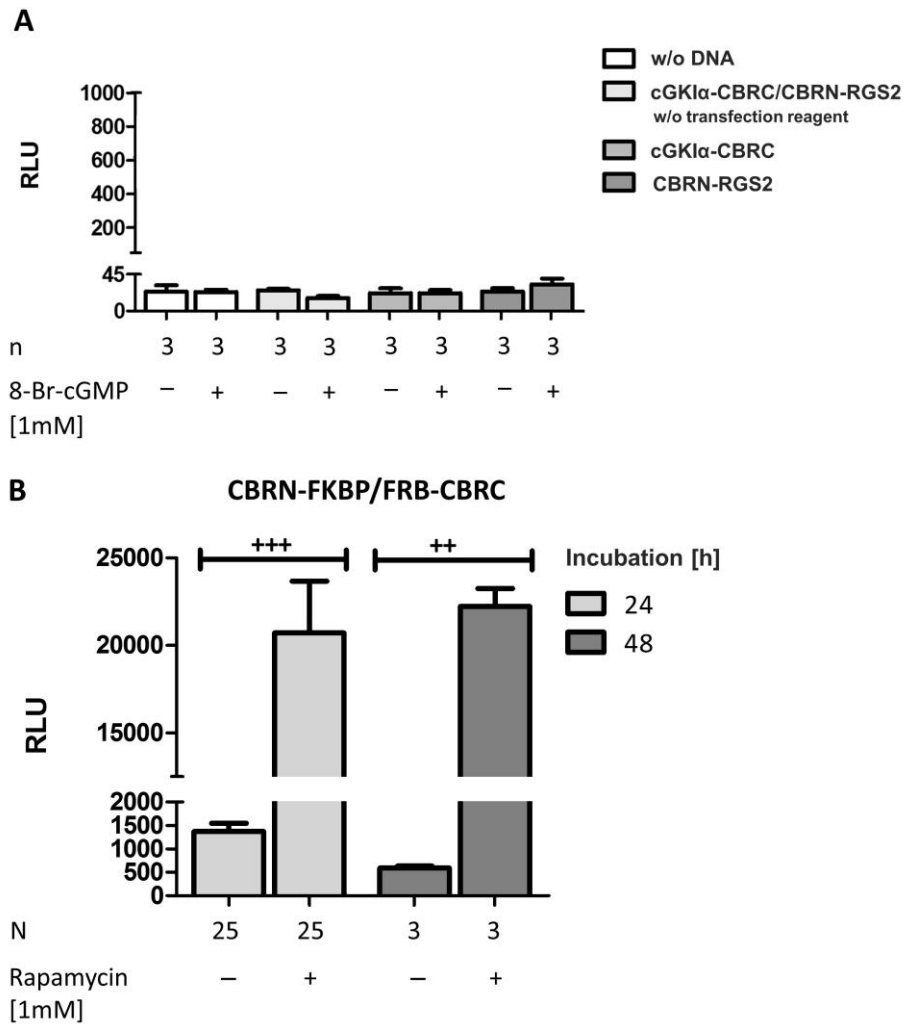

**Figure S1. Establishment of controls for luciferase assay.** **A: Negative controls.** COS7-cells were seeded in 6-well plates ( $3.3 \times 10^5$  cells/well) and transfected with different controls (150 ng each). After transfer on 96-well plates ( $1.0 \times 10^4$  cells/well) and addition of 8-Br-cGMP, cells were incubated for 24 h. **B: Positive controls.** COS7-cells were seeded in 6-well plates ( $3.3 \times 10^5$  cells/well) and transfected with 4.5  $\mu$ g DNA, vector ratio 1:1. After transfer on 96-well plates ( $1.0 \times 10^4$  cells/well) and addition of rapamycin, cells were either incubated for 24 or 48 h. A highly significant signal-increase could be observed in both conditions. Data is expressed as mean  $\pm$  SEM. For unpaired Student's *t*-test with Welch's correction, *p*-values  $< 0.01$  and  $< 0.001$  were considered highly significant ( $^{++}$  and  $^{+++}$ , respectively). N = technical replicates. RLU: relative luminescence unit.

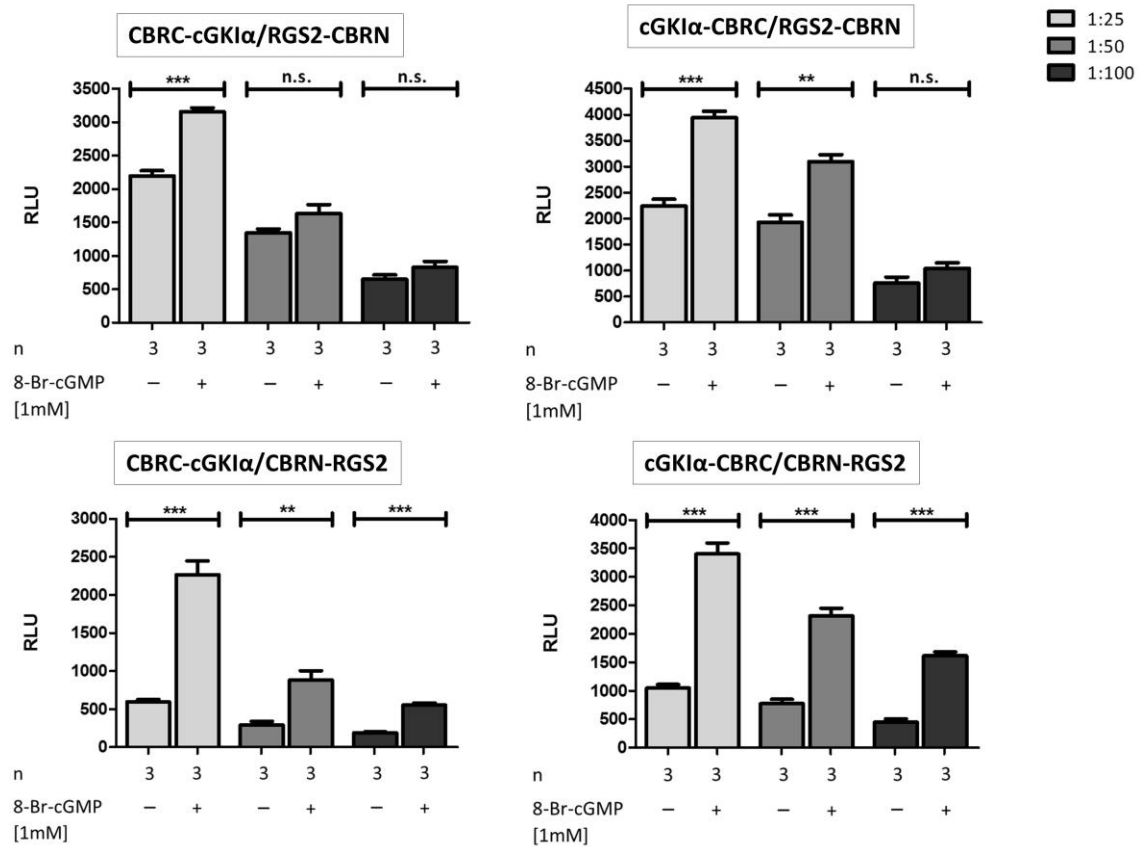

**Figure S2.** Influence of vector ratio for transfection and subsequent interaction analysis of cGKIα and RGS2 following 48 h incubation. COS7-cells were seeded in 6-well plates ( $3.3 \times 10^5$  cells/well) and transfected with 4 different combinations of cGKIα/RGS2-vectors (each transfection with 15 μg DNA, vector ratio as indicated). After transfer on 96-well plates ( $1.0 \times 10^4$  cells/well) and addition of 8-Br-cGMP, cells were incubated for 48 h. In most cases, a significant signal-increase can be observed. Data is expressed as mean  $\pm$  SEM. For unpaired Student's t-test,  $p$ -values  $< 0.01$  and  $< 0.001$  were considered highly significant (\*\* and \*\*\*, respectively), a non-significant difference was marked as n.s.. N = technical replicates. RLU: relative luminescence unit.

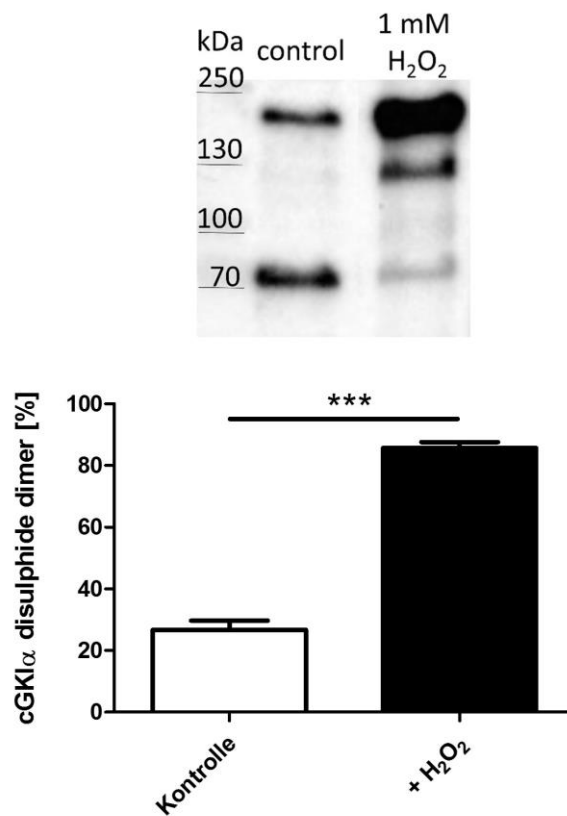

**Figure S3. Influence of H<sub>2</sub>O<sub>2</sub>-treatment on dimerization of cGKIα.** Primary mesangial cells were isolated and cultured as previously described (Am J Pathol, 2002, 161:799-805).  $4 \times 10^5$  cells were grown in 6-well plates until reaching 90% confluency and either left untreated or stimulated with 1 mM H<sub>2</sub>O<sub>2</sub> for 10 minutes. Cell-harvest was performed in 80  $\mu$ l of a non-reducing, maleimide-containing lysis buffer and 20  $\mu$ l of protein lysates were analyzed using SDS-PAGE and Western blot using cGKIα-antibodies. Compared to control cells, a highly significant increase in dimerization upon H<sub>2</sub>O<sub>2</sub>-treatment can be observed. Data is expressed as mean  $\pm$  SEM. For unpaired Student's t-test *p*-values < 0.001 were considered highly significant (\*\*\*). N = 7 each, biological replicates.
